# Supplementary material for: The Identification of Potential Biomarkers and Biological Pathways in Prostate Cancer
Source: PubMed Central journal article supplement — J Cancer. 2019 Feb 23;10(6):1398–408. doi: 10.7150/jca.29571 (PMC6485223; doi:10.7150/jca.29571), 2019-02-23
Supplement: jcav10p1398s1.pdf [file jcav10p1398s1.pdf]

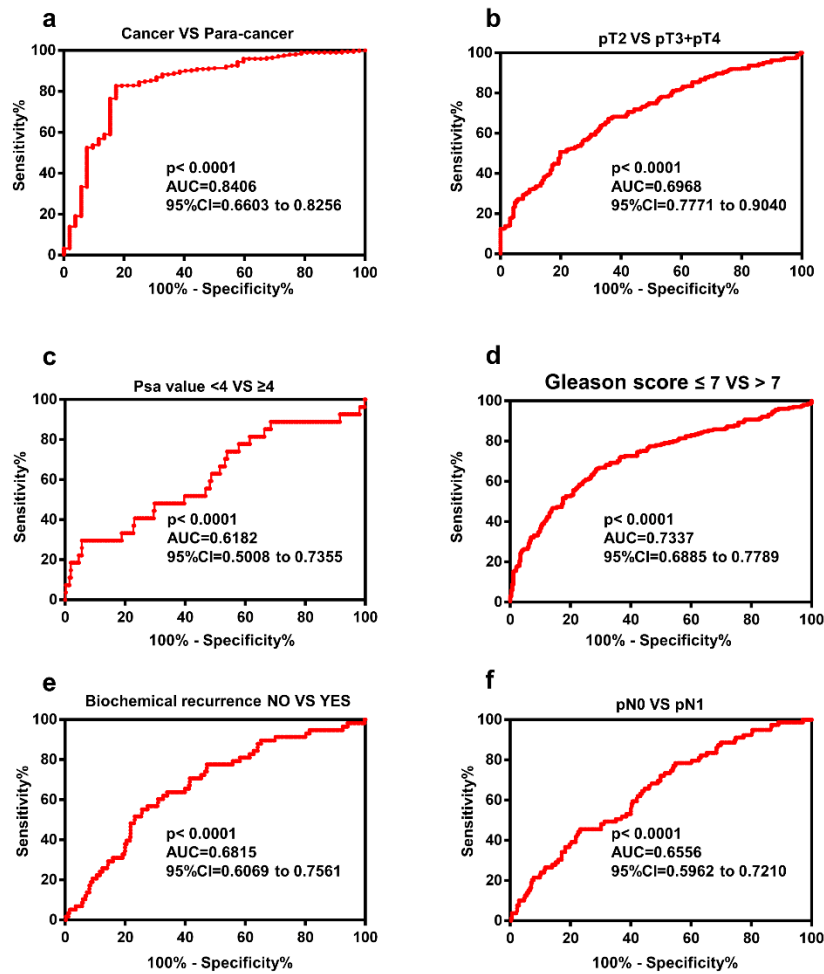

Figure S1. The diagnostic value of KIF20A in PCa

Table S1 Top 15 hub genes with higher degree of connectivity.

| Gene  | Degree of connectivity | Adjusted <i>P</i> value | Role in Pca                              | Refs                                                        |
|-------|------------------------|-------------------------|------------------------------------------|-------------------------------------------------------------|
| CDK1  | 76                     | 0.04                    | Regulate AR/ARV7                         | Nucleic Acids Res. 2017 Jan 06,<br>Oncotarget. 2016 Aug 31. |
| CCNB1 | 69                     | 0.01                    | Contributing to Pca                      | Mol Cancer Res. 2014<br>Jun;830-42.                         |
| BUB1  | 65                     | 0.01                    | Unknown                                  |                                                             |
| CENPA | 65                     | 0.01                    | Unknown                                  |                                                             |
| AURKB | 64                     | 0.02                    | Contributing to prostate cancer          | Prostate. 2006 Feb<br>15;66(3):326-33.                      |
| CCNB2 | 63                     | 0.00                    | Prostate cancer cell cycle-related genes | Cancer Res. 2017 Dec 12                                     |

|        |    |          |                                             |                                                               |
|--------|----|----------|---------------------------------------------|---------------------------------------------------------------|
| BIRC5  | 62 | 0.03     | Contributing to Pca metastasis              | Cancer. 2014 Oct 15                                           |
| AURKA  | 62 | 0.02     | Contributing to CRPC/<br>NEPC/Regulate ARV7 | J Clin Oncol. 2012 Feb 10;120,<br>Sci Rep. 2017 Feb 16;40957. |
| BUB1B  | 61 | 0.00     | Contributing to Pca                         | Onco Targets Ther. 2016;9                                     |
| TTK    | 61 | 0.00     | Unknown                                     |                                                               |
| KIF20A | 61 | 0.00     | Unknown                                     |                                                               |
| CDKN3  | 61 | 0.02     | Likely contributing to CRPC                 | PLoS One. 2013;e55975.                                        |
| KIF2C  | 59 | 0.00     | Likely contributing to CRPC                 | PLoS One. 2012;e31259                                         |
| NCAPG  | 59 | 0.00     | Likely contributing to CRPC                 | Cancer Med. 2018 Apr 02                                       |
| CDCA8  | 58 | 9.87E-04 | Unknown                                     |                                                               |

Table S2 Gene ontology analysis of differentially expressed genes associated with prostate cancer

| Expression    | Category         | Term                                                | Count | %        | P value  | FDR      |
|---------------|------------------|-----------------------------------------------------|-------|----------|----------|----------|
| Downregulated | GOTERM_BP_DIRECT | GO:0006936~muscle contraction                       | 14    | 4.38     | 1.08E-08 | 1.83E-05 |
|               | GOTERM_BP_DIRECT | GO:0060157~urinary bladder development              | 4     | 1.25     | 3.59E-05 | 6.07E-02 |
|               | GOTERM_BP_DIRECT | GO:0001822~kidney development                       | 9     | 2.81     | 5.55E-05 | 9.39E-02 |
|               | GOTERM_BP_DIRECT | GO:0008217~regulation of blood pressure             | 8     | 2.5      | 6.37E-05 | 1.08E-01 |
|               | GOTERM_BP_DIRECT | GO:0007155~cell adhesion                            | 20    | 6.25     | 1.03E-04 | 1.73E-01 |
|               | GOTERM_CC_DIRECT | GO:0005615~extracellular space                      | 51    | 15.94    | 5.78E-09 | 7.56E-06 |
|               | GOTERM_CC_DIRECT | GO:0005578~proteinaceous extracellular matrix       | 20    | 6.25     | 4.04E-08 | 5.28E-05 |
|               | GOTERM_CC_DIRECT | GO:0030018~Z disc                                   | 12    | 3.75     | 2.22E-06 | 2.90E-03 |
|               | GOTERM_CC_DIRECT | GO:0005576~extracellular region                     | 49    | 15.31    | 7.48E-06 | 9.78E-03 |
|               | GOTERM_CC_DIRECT | GO:0042383~sarcolemma                               | 9     | 2.81     | 5.11E-05 | 6.68E-02 |
|               | GOTERM_MF_DIRECT | GO:0008307~structural constituent of muscle         | 8     | 2.5      | 3.66E-06 | 5.15E-03 |
|               | GOTERM_MF_DIRECT | GO:0005198~structural molecule activity             | 14    | 4.38     | 1.49E-04 | 2.10E-01 |
|               | GOTERM_MF_DIRECT | GO:0005200~structural constituent of cytoskeleton   | 9     | 2.81     | 3.42E-04 | 4.79E-01 |
|               | GOTERM_MF_DIRECT | GO:0008201~heparin binding                          | 10    | 3.13     | 9.71E-04 | 1.36     |
|               | GOTERM_MF_DIRECT | GO:0003779~actin binding                            | 13    | 4.06     | 0.001531 | 2.13     |
| Upregulated   | GOTERM_BP_DIRECT | GO:0051301~cell division                            | 27    | 7.894737 | 5.54E-11 | 9.15E-08 |
|               | GOTERM_BP_DIRECT | GO:0007067~mitotic nuclear division                 | 22    | 6.432749 | 3.94E-10 | 6.50E-07 |
|               | GOTERM_BP_DIRECT | GO:0007062~sister chromatid cohesion                | 13    | 3.80117  | 7.64E-08 | 1.26E-04 |
|               | GOTERM_BP_DIRECT | GO:0006977~DNA damage response, signal transduction | 9     | 2.631579 | 5.45E-06 | 9.00E-03 |

---

| by p53 class mediator resulting in cell cycle arrest |                                                                                                                          |    |          |          |          |
|------------------------------------------------------|--------------------------------------------------------------------------------------------------------------------------|----|----------|----------|----------|
| GOTERM_BP_DIRECT                                     | GO:0008283~cell proliferation                                                                                            | 19 | 5.555556 | 2.07E-05 | 3.42E-02 |
| GOTERM_CC_DIRECT                                     | GO:0030496~midbody                                                                                                       | 13 | 3.80117  | 9.40E-07 | 1.24E-03 |
| GOTERM_CC_DIRECT                                     | GO:0000775~chromosome, centromeric region                                                                                | 9  | 2.631579 | 2.91E-06 | 3.82E-03 |
| GOTERM_CC_DIRECT                                     | GO:0005819~spindle                                                                                                       | 11 | 3.216374 | 2.18E-05 | 2.86E-02 |
| GOTERM_CC_DIRECT                                     | GO:0032133~chromosome passenger complex                                                                                  | 4  | 1.169591 | 3.78E-05 | 4.96E-02 |
| GOTERM_CC_DIRECT                                     | GO:0000777~condensed chromosome kinetochore                                                                              | 9  | 2.631579 | 6.83E-05 | 8.98E-02 |
| GOTERM_MF_DIRECT                                     | GO:0003700~transcription factor activity, sequence-specific DNA binding                                                  | 29 | 8.479532 | 0.001085 | 1.50     |
| GOTERM_MF_DIRECT                                     | GO:0001047~core promoter binding                                                                                         | 6  | 1.754386 | 0.003187 | 4.34     |
| GOTERM_MF_DIRECT                                     | GO:0043565~sequence-specific DNA binding                                                                                 | 18 | 5.263158 | 0.003208 | 4.37     |
| GOTERM_MF_DIRECT                                     | GO:0003682~chromatin binding                                                                                             | 15 | 4.385965 | 0.003402 | 4.63     |
| GOTERM_MF_DIRECT                                     | GO:0001077~transcriptional activator activity, RNA polymerase II core promoter proximal region sequence-specific binding | 11 | 3.216374 | 0.004003 | 5.43     |

---

GO: gene ontology; FDR: false discovery rate.

Table S3 KEGG pathway analysis of differentially expressed genes associated with prostate cancer.

| Category              | Term                                             | Count | %    | P value | FDR  |
|-----------------------|--------------------------------------------------|-------|------|---------|------|
| Downregulated<br>DEGs | hsa04270:Vascular smooth muscle contraction      | 11    | 3.44 | 0.00    | 0.02 |
|                       | hsa04022:cGMP-PKG signaling pathway              | 11    | 3.44 | 0.00    | 0.33 |
|                       | hsa04020:Calcium signaling pathway               | 10    | 3.13 | 0.00    | 2.38 |
| Upregulated<br>DEGs   | hsa04110:Cell cycle                              | 12    | 3.51 | 0.00    | 0.00 |
|                       | hsa04114:Oocyte meiosis                          | 11    | 3.22 | 0.00    | 0.00 |
|                       | hsa04115:p53 signaling pathway                   | 8     | 2.34 | 0.00    | 0.06 |
|                       | hsa04914:Progesterone-mediated oocyte maturation | 6     | 1.75 | 0.01    | 9.58 |

Table S4 KEGG pathway analysis of top 15 hub genes with higher degree of connectivity.

| Term                                              | Count | %     | PValue   | Genes                                                                                        | FDR      |
|---------------------------------------------------|-------|-------|----------|----------------------------------------------------------------------------------------------|----------|
| hsa04110: Cell cycle                              | 13    | 10.92 | 1.41E-09 | CDK1, TTK, ESPL1, PTTG1, CDC25C, CCNB1, CCNE1, CDKN2A, CCNB2, CCND2, BUB1, MDM2, BUB1B       | 1.65E-06 |
| hsa04114: Oocyte meiosis                          | 12    | 10.08 | 4.70E-09 | PGR, CCNE1, CDK1, ADCY1, PPP2R5C, BUB1, IGF1, AURKA, CAMK2B, ESPL1, PTTG1, CDC25C            | 5.49E-06 |
| hsa04115: p53 signaling pathway                   | 10    | 8.40  | 1.04E-08 | CCNB1, CCNE1, CDK1, CDKN2A, CCNB2, CCND2, RRM2, MDM2, IGF1, GTSE1                            | 1.22E-05 |
| hsa05414: Dilated cardiomyopathy                  | 9     | 7.56  | 1.10E-06 | ADCY1, ACTC1, DES, MYL2, PLN, IGF1, TNNI3, TPM2, TPM1                                        | 1.29E-03 |
| hsa04261: Adrenergic signaling in cardiomyocytes  | 10    | 8.40  | 8.71E-06 | AGTR1, ADCY1, ACTC1, MYL2, PLN, PPP2R5C, CAMK2B, TNNI3, TPM2, TPM1                           | 1.02E-02 |
| hsa04914: Progesterone-mediated oocyte maturation | 8     | 6.72  | 1.68E-05 | CCNB1, PGR, CDK1, ADCY1, CCNB2, BUB1, IGF1, CDC25C                                           | 1.96E-02 |
| hsa04020: Calcium signaling pathway               | 10    | 8.40  | 4.46E-05 | EDNRA, EDNRB, AGTR1, ADCY1, NOS1, CHRM1, PLN, CAMK2B, PTGFR, MYLK                            | 5.20E-02 |
| hsa05200: Pathways in cancer                      | 14    | 11.76 | 6.91E-05 | BMP4, RET, ADCY1, PTGS2, PPARG, IGF1, KITLG, BIRC5, EDNRA, CCNE1, EDNRB, AGTR1, CDKN2A, MDM2 | 8.06E-02 |
| hsa05410: Hypertrophic cardiomyopathy (HCM)       | 7     | 5.88  | 9.04E-05 | ACTC1, DES, MYL2, IGF1, TNNI3, TPM2, TPM1                                                    | 1.05E-01 |
| hsa04270: Vascular smooth muscle contraction      | 8     | 6.72  | 1.26E-04 | EDNRA, ACTG2, AGTR1, ADCY1, ACTA2, PRKG1, MYLK, MYL9                                         | 1.48E-01 |

Table S5 Association of the 15 hub genes with PC Biochemical Recurrence

| Genes  | Recurrence NO        | Recurrence YES       | p-value |
|--------|----------------------|----------------------|---------|
|        | Median of expression | Median of expression |         |
| CDK1   | 6.742                | 7.541                | <0.0001 |
| CCNB1  | 7.585                | 7.918                | 0.0164  |
| BUB1   | 5.393                | 6.639                | <0.0001 |
| CENPA  | 3.946                | 4.952                | <0.0001 |
| AURKB  | 4.645                | 5.404                | 0.0002  |
| CCNB2  | 6.659                | 7.097                | 0.0014  |
| BIRC5  | 5.530                | 6.385                | 0.0001  |
| AURKA  | 5.831                | 6.399                | <0.0001 |
| BUB1B  | 5.811                | 6.562                | <0.0001 |
| TTK    | 5.609                | 6.561                | <0.0001 |
| KIF20A | 5.626                | 6.680                | <0.0001 |
| CDKN3  | 4.602                | 5.458                | 0.0002  |
| KIF2C  | 5.471                | 6.181                | <0.0001 |
| NCAPG  | 5.859                | 6.409                | <0.0001 |
| CDCA8  | 6.051                | 6.577                | 0.0002  |

Table S6 Correlation between KIF20A mRNA expression and clinicopathological parameters of prostate cancer patients.

| Parameter   |          | Number | KIF20A mRNA expression |              | P value |
|-------------|----------|--------|------------------------|--------------|---------|
|             |          |        | Low (n=155)            | High (n=154) |         |
| Age (years) | <60      | 116    | 64                     | 52           | 0.197   |
|             | >=60     | 193    | 91                     | 102          |         |
| PSA         | <4       | 297    | 148                    | 149          | 0.770   |
|             | >=4      | 12     | 7                      | 5            |         |
| T stage     | T1 or T2 | 110    | 73                     | 37           | 0.000   |
|             | T3 or T4 | 199    | 82                     | 117          |         |
| N stage     | N0       | 257    | 139                    | 118          | 0.002   |
|             | N1       | 52     | 16                     | 36           |         |
| M stage     | M0       | 308    | 155                    | 153          | 0.498   |
|             | M1       | 1      | 0                      | 1            |         |
| Biochemical | NO       | 270    | 140                    | 130          |         |

---

|               |     |     |     |    |       |
|---------------|-----|-----|-----|----|-------|
| recurrence    |     |     |     |    |       |
|               | YES | 39  | 15  | 24 | 0.127 |
| Gleason score | <8  | 168 | 102 | 66 |       |
|               | >=8 | 141 | 53  | 88 | 0.000 |

---
